# Supplementary material for: Validating the biological origin of in vivo fractional intracellular volume from VERDICT-MRI in the prostate
Source: Research Square preprint supplement (doi:10.21203/rs.3.rs-7723707/v1), 2025-10-23
Supplement: Supplementary file 1 [file d9d9946e0bb444de33eaf5fc.docx]

## mpMRI ADC sequence details

Tables S1 and S2 illustrate the heterogeneity of scanner and sequence parameters used to obtain ADC maps in the clinical mpMRI used in this study.

**Table S1. Distribution of b-values used for calculation of ADC maps in clinical mpMRI.**

| b-values (s/mm2) | Number of patients |
| --- | --- |
| 0, 1000 | 5 |
| 0, 1400 | 2 |
| 0, 150, 500, 1000 | 12 |
| 0, 150, 800, 1600 | 7 |
| 0, 500, 800, 1200 | 1 |
| 0, 50, 800, 1400 | 3 |
| 50, 150, 500, 1000 | 19 |
| 50, 150, 500, 1000, 1400 | 1 |
| 50, 400, 800, 1200 | 1 |
| 50, 500, 1000, 1500 | 1 |

## Table S2. Distribution of field strengths used for clinical mpMRI.

| Field strength (T) | Number of patients |
| --- | --- |
| 1.5 | 25 |
| 3 | 27 |
